# Supplementary material for: Fast odour dynamics are encoded in the olfactory system and guide behaviour
Source: Springer Nature journal article supplement (doi:10.1038/s41586-021-03514-2), 2021-05-05
Supplement: 41586_2021_3514_MOESM1_ESM.pdf [file 41586_2021_3514_MOESM1_ESM.pdf]

## Supplementary information

---

# Fast odour dynamics are encoded in the olfactory system and guide behaviour

---

In the format provided by the authors and unedited

**Supplementary Table 1: Parameters of the olfactory sensory neuron population model**

| <b>Parameter</b> | <b>Description</b>                                        | <b>Value</b> |
|------------------|-----------------------------------------------------------|--------------|
| $\tau_C$         | Olfactory transduction time constant                      | 75 ms        |
| $\tau_V$         | OSN membrane time constant                                | 75 ms        |
| $\sigma$         | Standard deviation of OSN membrane voltage additive noise | 0.25 V       |
| $a$              | Stimulus amplitude                                        | 15 V         |
| $\theta$         | OSN spike threshold                                       | 2 V          |
| $t_{ref}$        | OSN refractory period                                     | 1 sec        |
| $V_{ref}$        | OSN refractory voltage                                    | -1 V         |
| $\tau_h$         | Ca <sup>2+</sup> imaging filter time constant             | 150 ms       |
| $\Delta t$       | Euler integration step size                               | 1 ms         |

**Supplementary Table 2: Parameters of the olfactory sensory neuron population model that were varied**

| <b>Parameter</b> | <b>Centre</b> | <b>Minimum</b> | <b>Maximum</b> |
|------------------|---------------|----------------|----------------|
| $\tau_V$         | 75 ms         | 56.25 ms       | 93.75 ms       |
| $\tau_C$         | 75 ms         | 56.26 ms       | 93.75 ms       |
| $\sigma$         | 0.25 V        | 0.1875 V       | 0.3125 V       |
| $\theta$         | 2 V           | 1.5 V          | 2.5 V          |
| $a$              | 5             | 3.75 V         | 6.25 V         |
